# Supplementary material for: Catalytic Performance of Nitrogen-Doped Activated Carbon Supported Pd Catalyst for Hydrodechlorination of 2,4-Dichlorophenol or Chloropentafluoroethane
Source: MDPI journal article supplement (doi:10.3390/molecules24040674), 2019-02-14
Supplement: s1 [file s1]

# Catalytic Performance of Nitrogen-Doped Activated Carbon Supported Pd Catalyst for Hydrodechlorination of 2,4-Dichlorophenol or Chloropentafluoroethane

Haodong Tang<sup>1</sup>, Bin Xu<sup>1</sup>, Meng Xiang<sup>1</sup>, Xinxin Chen<sup>1</sup>, Yao Wang<sup>1</sup> and Zongjian Liu<sup>1,\*</sup>

<sup>1</sup> Institute of Industrial Catalysis, College of Chemical Engineering, Zhejiang University of Technology, Hangzhou, 300014, P.R. China

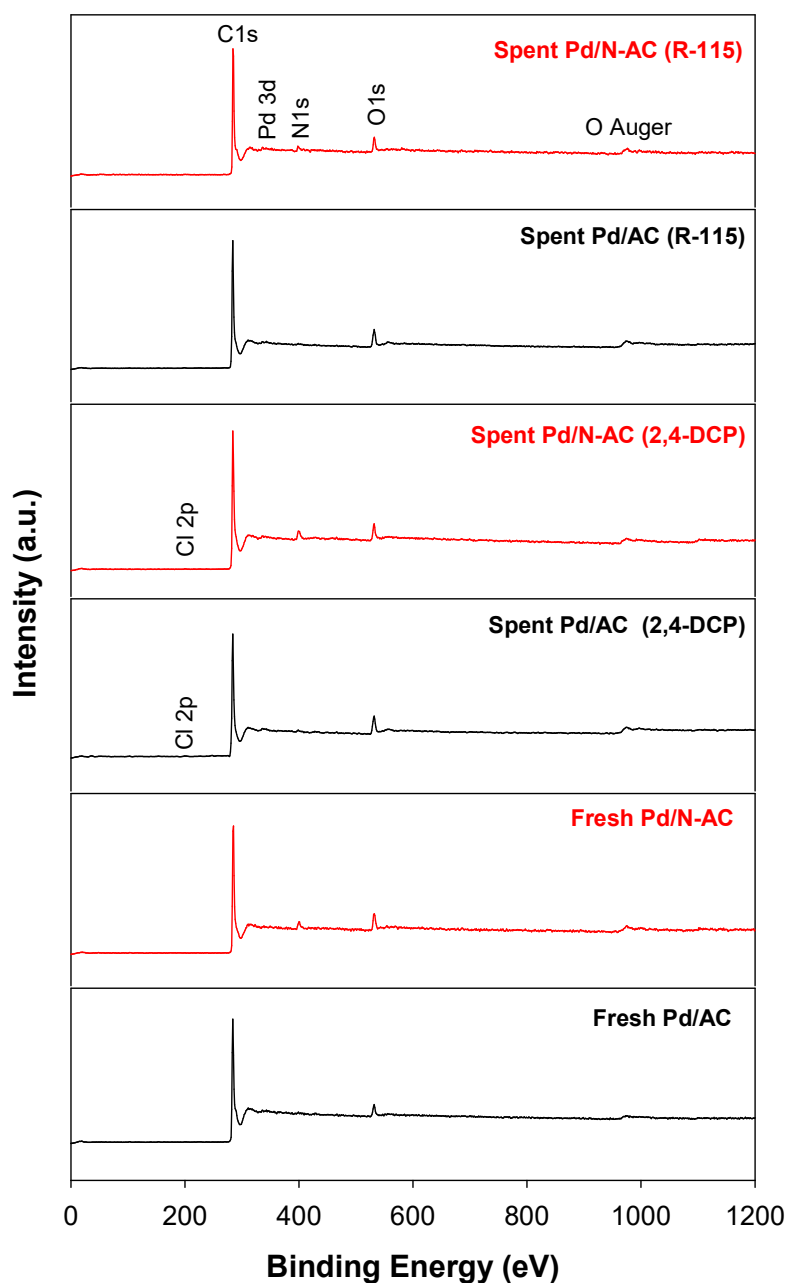

**Fig. 1S** Wide-scan XPS spectra of fresh and spent catalysts.

Table 1S The concentration of O and Cl on the surface of catalysts before and after reaction  
determined by the wide-scan XPS spectra \*

| Sample                  | Content of O/% | Content of Cl/% |
|-------------------------|----------------|-----------------|
| fresh Pd/AC-            | 4.3            | -               |
| fresh Pd/N-AC           | 5.9            | -               |
| spent Pd/AC (2,4-DCP)   | 7.3            | 0.4             |
| spent Pd/N-AC (2,4-DCP) | 6.9            | 0.5             |
| spent Pd/AC (R-115)     | 6.8            | -               |
| spent Pd/N-AC (R-115)   | 5.0            | -               |

\* The observed O mainly comes from the support (namely AC) and adsorbed O-containing materials. The Cl observed on the surface of the catalysts after hydrodechlorination of 2,4-DCP can be attributed to the adsorption of the product HCl by the catalysts.
